# Supplementary material
Source: PubMed Central journal article supplement (PMC6568008)
Supplement: NIHMS1008980-supplement-Supplementary.pdf [file NIHMS1008980-supplement-Supplementary.pdf]

## SUPPLEMENTARY INFORMATION

**Table 1**

| Antibody                                             | Vendor                               | Dilution |
|------------------------------------------------------|--------------------------------------|----------|
| anti- <i>Pseudomonas</i> antibody<br>(custom made)   | Covance, Denver, PA                  | 1:1000   |
| anti- <i>Acinetobacter</i> antibody<br>(custom made) | Covance, Denver, PA                  | 1:2000   |
| E-cadherin/ CDH1 antibody                            | ThermoFisher Scientific, Waltham, MA | 1:200    |
| pNF- $\kappa$ B antibody                             | Abcam, CA                            | 1:200    |

**Table 2**

|                                   |
|-----------------------------------|
| <i>E. coli</i>                    |
| <i>Corynebacterium sp.</i>        |
| <i>Enterococcus faecalis</i>      |
| <i>Staphylococcus chromogenes</i> |
| <i>Staphylococcus aureus</i>      |
| <i>Enterococcus casseliflavus</i> |
| <i>Streptococcus dysgalactiae</i> |
| <i>Pasteurella multocida</i>      |
| <i>Streptococcus porcinus</i>     |
| <i>Trueperella pyogenes</i>       |

## Figure Legend

### Figure S1

Representative images of H&E-stained day 35 wound tissues (scale bar: 5mm). The re-epithelialized portion is marked with broken lines and the leading epithelial tongue is shown using black arrow heads. The wound epithelial margins is shown in inset (scale bar: 500 $\mu$ m).

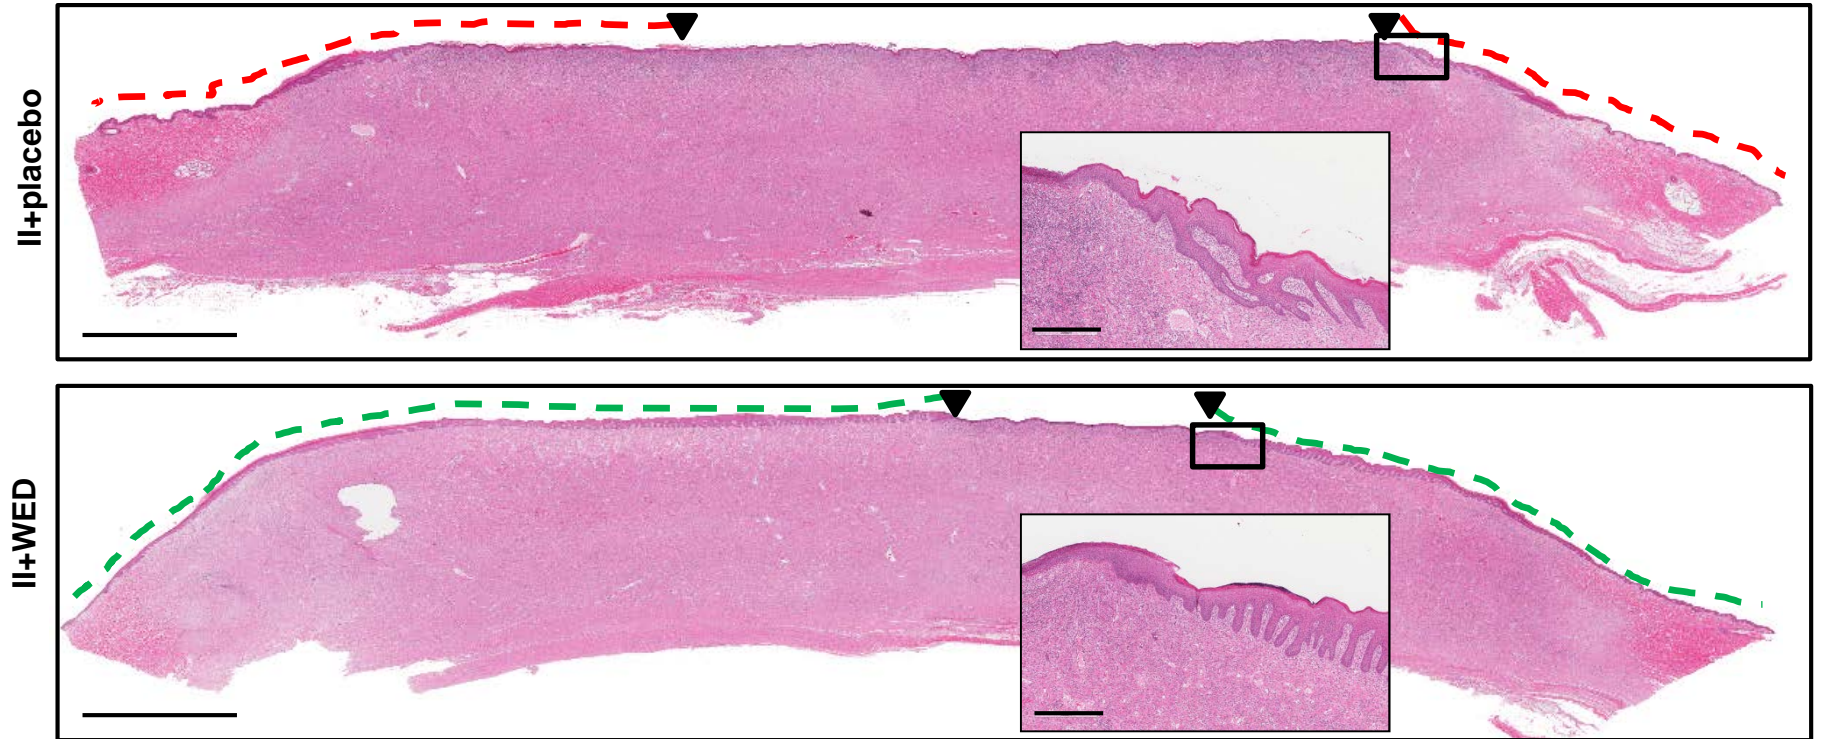

Fig. S1
